# Supplementary material for: Supramolecular assembly and structural transformation of d10-metal complexes containing (aza-15-crown-5)dithiocarbamate
Source: Royal Society of Chemistry journal article supplement (doi:10.1039/d2dt02768b), 2022-01-01
Supplement: d2dt02768b1.pdf [file d2dt02768b1.pdf]

## **Supramolecular assembly and structural transformation of d<sup>10</sup>-metal complexes containing (aza-15-crown-5)dithiocarbamate**

Biing-Chiau Tzeng,<sup>\*,a</sup> Chung-Lun Wu,<sup>a</sup> Jun-Wei Hung,<sup>a</sup> Su-Ying Chien<sup>b</sup> and Gene-Hsiang Lee<sup>b</sup>

<sup>a</sup>Department of Chemistry and Biochemistry, National Chung Cheng University, 168 University Road, Min-Hsiung, Chiayi 62102, Taiwan

<sup>b</sup>Department of Chemistry, National Taiwan University, 1, Sec. 4, Roosevelt Road, Taipei 10617, Taiwan

**Table S1** Crystallographic Data of **1-6**.

|                                                                 | <b>1</b>                                                         | <b>2</b>                                                                                      | <b>2'</b>                                                                                       | <b>3</b>                                                                         | <b>4</b>                                                                         | <b>5</b>                                                                        | <b>6</b>                                                                         |
|-----------------------------------------------------------------|------------------------------------------------------------------|-----------------------------------------------------------------------------------------------|-------------------------------------------------------------------------------------------------|----------------------------------------------------------------------------------|----------------------------------------------------------------------------------|---------------------------------------------------------------------------------|----------------------------------------------------------------------------------|
| Empirical formula                                               | C <sub>11</sub> H <sub>20</sub> AgNO <sub>4</sub> S <sub>2</sub> | C <sub>52</sub> H <sub>92</sub> Cu <sub>4</sub> N <sub>8</sub> O <sub>16</sub> S <sub>8</sub> | C <sub>88</sub> H <sub>160</sub> Cu <sub>8</sub> N <sub>8</sub> O <sub>32</sub> S <sub>16</sub> | C <sub>22</sub> H <sub>42</sub> AgLiN <sub>2</sub> O <sub>9</sub> S <sub>4</sub> | C <sub>22</sub> H <sub>40</sub> AgN <sub>2</sub> NaO <sub>8</sub> S <sub>4</sub> | C <sub>22</sub> H <sub>40</sub> AgKN <sub>2</sub> O <sub>8</sub> S <sub>4</sub> | C <sub>22</sub> H <sub>40</sub> AgN <sub>2</sub> O <sub>8</sub> RbS <sub>4</sub> |
| Formula weight                                                  | 402.27                                                           | 1595.97                                                                                       | 2863.51                                                                                         | 721.62                                                                           | 719.66                                                                           | 735.77                                                                          | 782.14                                                                           |
| Crystal system                                                  | Orthorhombic                                                     | Tetragonal                                                                                    | Triclinic                                                                                       | Triclinic                                                                        | Monoclinic                                                                       | Hexagonal                                                                       | Hexagonal                                                                        |
| Space group                                                     | Pccn                                                             | I-4                                                                                           | P-1                                                                                             | P-1                                                                              | C2/c                                                                             | P6 <sub>3</sub> 22                                                              | P6 <sub>5</sub> 22                                                               |
| a (Å)                                                           | 16.7239(16)                                                      | 19.5073(4)                                                                                    | 13.0623(9)                                                                                      | 10.0460(19)                                                                      | 31.430(6)                                                                        | 9.656(2)                                                                        | 9.70500(7)                                                                       |
| b (Å)                                                           | 21.489(3)                                                        | 19.5073(4)                                                                                    | 13.8962(10)                                                                                     | 10.0552(19)                                                                      | 20.015(5)                                                                        | 9.656(2)                                                                        | 9.70500(7)                                                                       |
| c (Å)                                                           | 8.2014(9)                                                        | 8.9948(2)                                                                                     | 17.5548(12)                                                                                     | 16.237(3)                                                                        | 18.982(4)                                                                        | 57.87(2)                                                                        | 58.1123(7)                                                                       |
| α(°)                                                            | 90                                                               | 90                                                                                            | 75.058(2)                                                                                       | 93.574(2)                                                                        | 90                                                                               | 90                                                                              | 90                                                                               |
| β(°)                                                            | 90                                                               | 90                                                                                            | 79.229(2)                                                                                       | 104.499(3)                                                                       | 95.95(2)                                                                         | 90                                                                              | 90                                                                               |
| γ(°)                                                            | 90                                                               | 90                                                                                            | 74.115(2)                                                                                       | 96.368(2)                                                                        | 90                                                                               | 120                                                                             | 120                                                                              |
| V (Å <sup>3</sup> ), Z                                          | 2947.5(6), 8                                                     | 3422.83(16), 2                                                                                | 2937.9(4), 1                                                                                    | 1571.2(5), 2                                                                     | 11877(5), 16                                                                     | 4672(3), 6                                                                      | 4740.12(9), 6                                                                    |
| F(000) (e)                                                      | 1632                                                             | 1664                                                                                          | 1488                                                                                            | 748                                                                              | 5952                                                                             | 2280                                                                            | 2388                                                                             |
| μ(Mo-Kα) (mm <sup>-1</sup> )                                    | 1.659                                                            | 1.537                                                                                         | 1.779                                                                                           | 0.955                                                                            | 1.021                                                                            | 1.093                                                                           | 2.477                                                                            |
| T (K)                                                           | 100(2)                                                           | 150(2)                                                                                        | 150(2)                                                                                          | 173(2)                                                                           | 173(2)                                                                           | 173(2)                                                                          | 150(2)                                                                           |
| Reflections collected                                           | 13261                                                            | 38501                                                                                         | 53694                                                                                           | 5583                                                                             | 44976                                                                            | 36217                                                                           | 43051                                                                            |
| Independent reflections (R <sub>int</sub> =0.056) (Fo ≥ 2σ(Fo)) | 2592                                                             | 5003                                                                                          | 13392                                                                                           | 5583                                                                             | 13527                                                                            | 3589                                                                            | 4631                                                                             |
|                                                                 | (R <sub>int</sub> =0.056)                                        | (R <sub>int</sub> =0.045)                                                                     | (R <sub>int</sub> =0.083)                                                                       | (R <sub>int</sub> =0.050)                                                        | (R <sub>int</sub> =0.177)                                                        | (R <sub>int</sub> =0.047)                                                       | (R <sub>int</sub> =0.045)                                                        |
| Refined parameters                                              | 172                                                              | 200                                                                                           | 698                                                                                             | 381                                                                              | 693                                                                              | 186                                                                             | 174                                                                              |
| Goodness-of-fit on F <sup>2</sup>                               | 1.047                                                            | 1.046                                                                                         | 1.009                                                                                           | 1.105                                                                            | 0.929                                                                            | 1.336                                                                           | 1.125                                                                            |
| R <sup>a</sup> , R <sub>w</sub> <sup>b</sup> (I ≥ 2σ(I))        | 0.0350, 0.0812                                                   | 0.0178, 0.0414                                                                                | 0.0526, 0.1150                                                                                  | 0.0925, 0.2254                                                                   | 0.0728, 0.1627                                                                   | 0.0648, 0.1479                                                                  | 0.0274, 0.0672                                                                   |
| R <sup>a</sup> , R <sub>w</sub> <sup>b</sup> (all data)         | 0.0457, 0.0882                                                   | 0.0190, 0.0417                                                                                | 0.0934, 0.1371                                                                                  | 0.1015, 0.2316                                                                   | 0.1918, 0.2123                                                                   | 0.0666, 0.1488                                                                  | 0.0287, 0.0677                                                                   |

$${}^aR = \frac{\sum ||F_o| - |F_c||}{\sum |F_o|}, \quad {}^bR_w = \left\{ \frac{\sum w(F_o^2 - F_c^2)^2}{\sum [w(F_o^2)]} \right\}^{1/2}.$$

## Supporting Information

Figure S1. The packing diagram of complex **3** with each  $\text{Li}^+$  ion of 50% disorder.

Figure S2. Experimental and simulated powder X-ray diffraction patterns of complex **1**.

Figure S3. Experimental and simulated powder X-ray diffraction patterns of complex **2**

Figure S4. Experimental and simulated powder X-ray diffraction patterns of complex **2'**.

Figure S5. Experimental and simulated powder X-ray diffraction patterns of complex **3**.

Figure S6. Experimental and simulated powder X-ray diffraction patterns of complex **4**.

Figure S7. Experimental and simulated powder X-ray diffraction patterns of complex **5**.

Figure S8. Experimental and simulated powder X-ray diffraction patterns of complex **6**.

Figure S9. The TGA trace of complex **1**.

Figure S10. The TGA trace of complex **2**.

Figure S11. The TGA trace of complex **2'**.

Figure S12. The TGA trace of complex **3**.

Figure S13. The TGA trace of complex **4**.

Figure S14. The TGA trace of complex **5**.

Figure S15. The TGA trace of complex **6**.

Figure S16. Luminescence spectra for solid samples of  $\text{KO}_4\text{NCS}_2$  (orange line), complexes **1** (blue line), **2** (pink line), and **2'** (green line) and quartz disc (background : gray dash dotted line) at room temperature. The excitation wavelength is 350 nm.

Figure S17. Luminescence spectra for solid samples of  $\text{KO}_4\text{NCS}_2$  (purple line), complexes **3** (red line), **4** (blue line), **5** (pink line), and **6** (green line) and quartz disc (background : gray dash dotted line) at room temperature. The excitation wavelength is 350 nm.

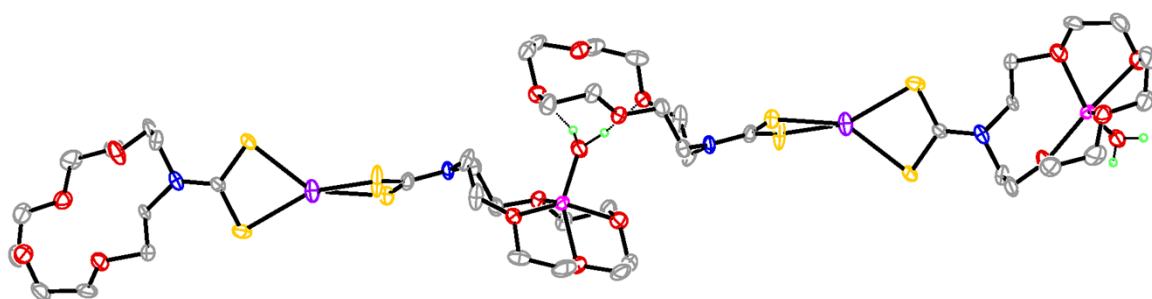

Figure S1. The packing diagram of complex **3** with each  $\text{Li}^+$  ion of 50 % disorder.

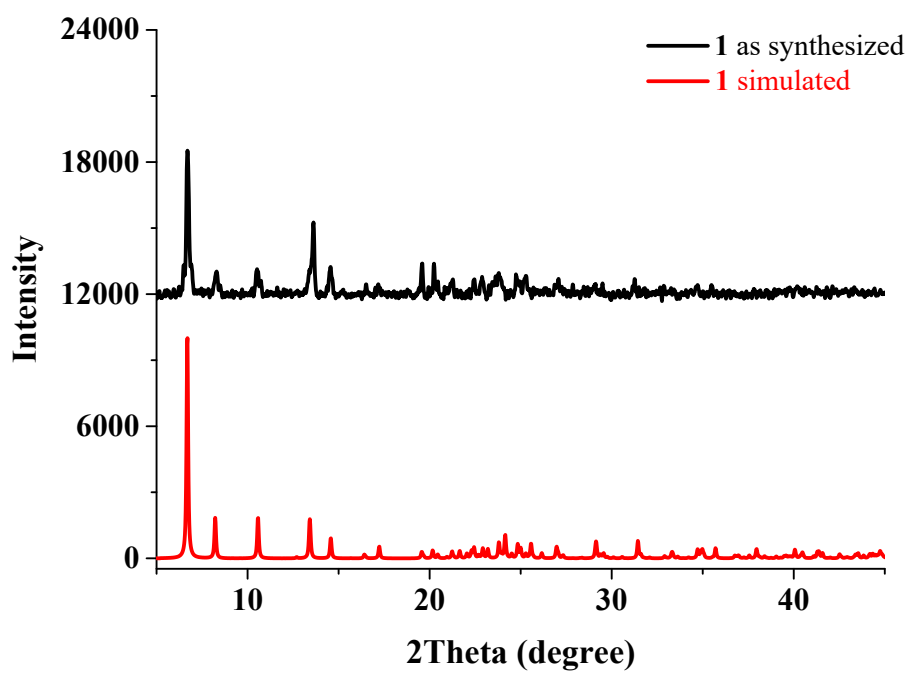

Figure S2. The experimental and simulated powder X-ray diffraction patterns of complex **1**.

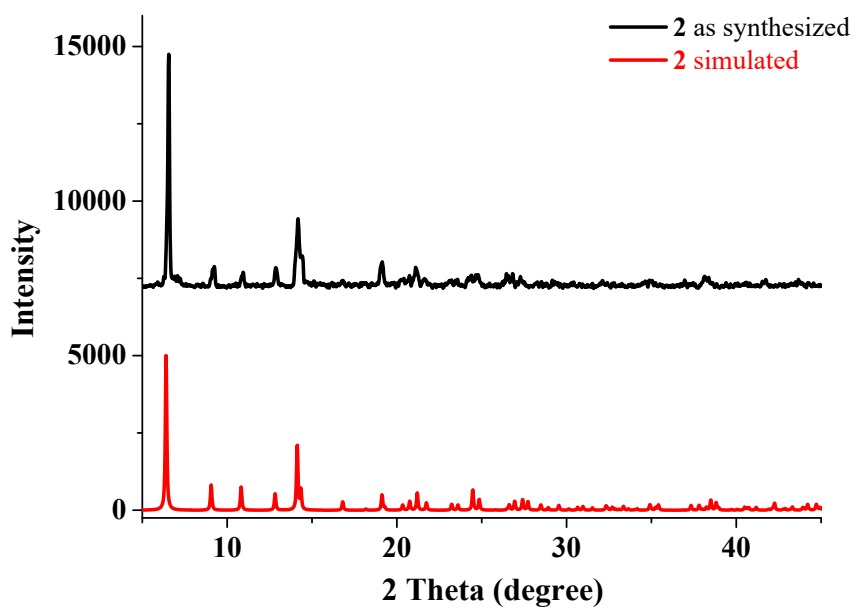

Figure S3. The experimental and simulated powder X-ray diffraction patterns of complex 2.

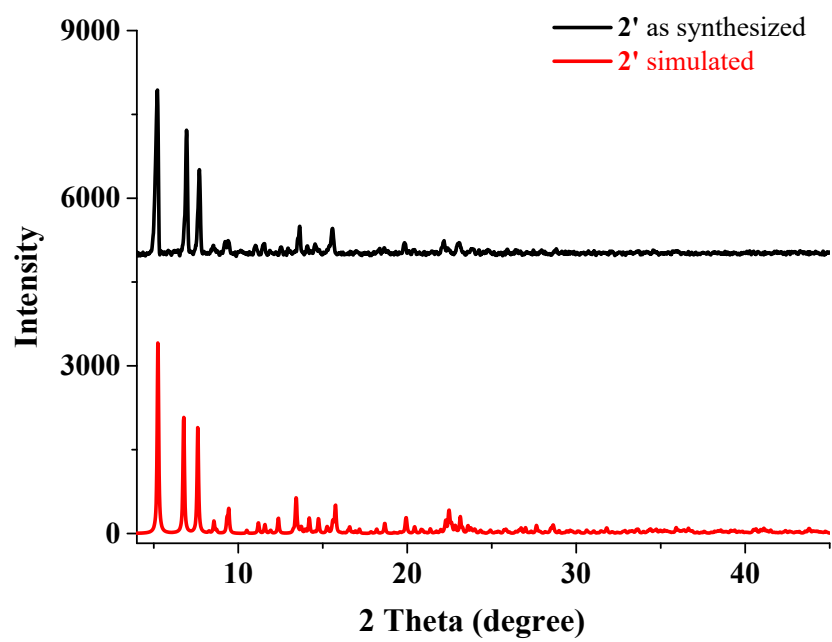

Figure S4. The experimental and simulated powder X-ray diffraction patterns of complex **2'**.

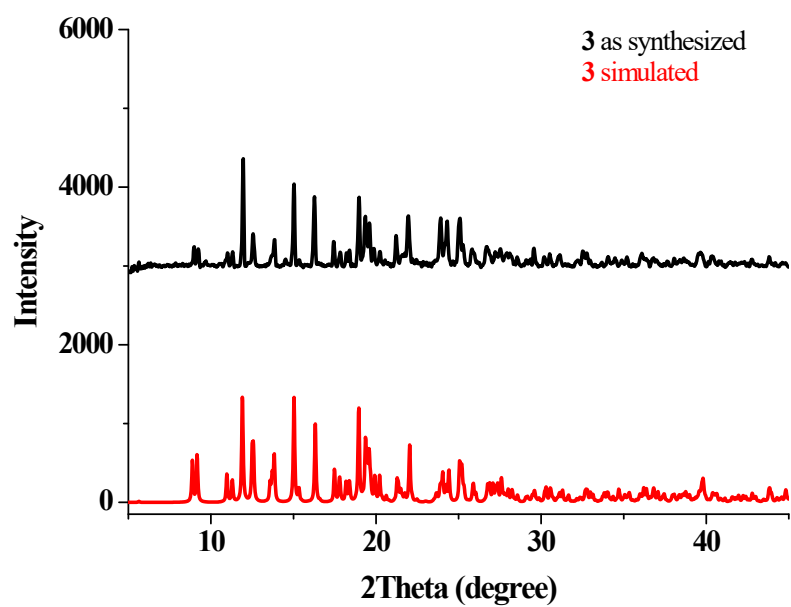

Figure S5. The experimental and simulated powder X-ray diffraction patterns of complex **3**.



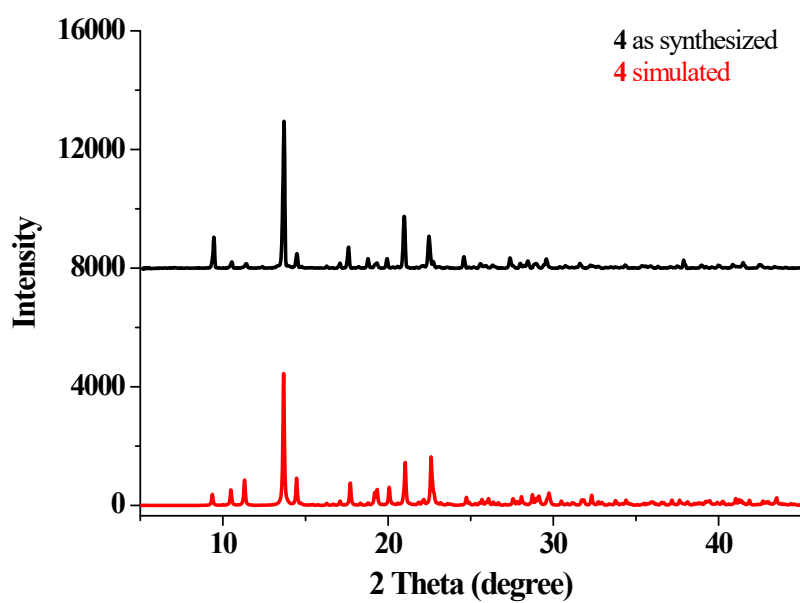

Figure S6. The experimental and simulated powder X-ray diffraction patterns of complex 4.

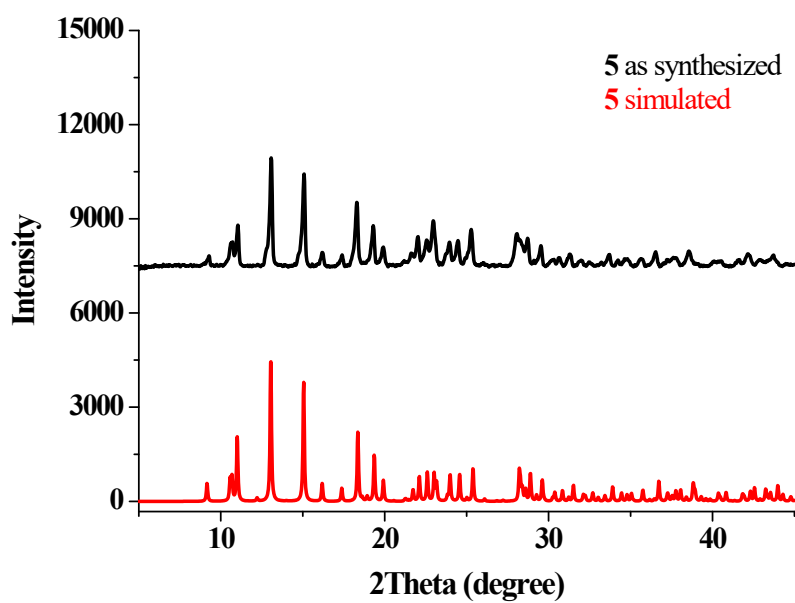

Figure S7. The experimental and simulated powder X-ray diffraction patterns of complex **5**.

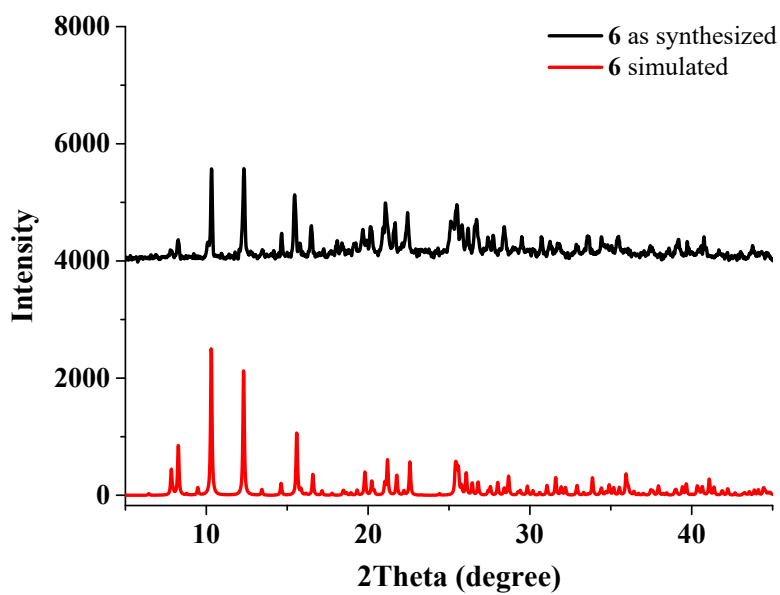

Figure S8. The experimental and simulated powder X-ray diffraction patterns of complex **6**.

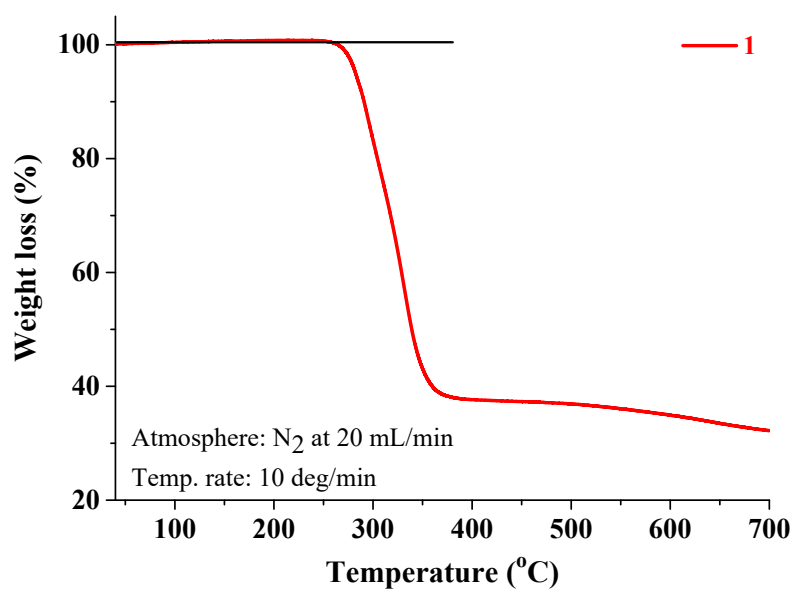

Figure S9. The TGA trace of complex **1**.

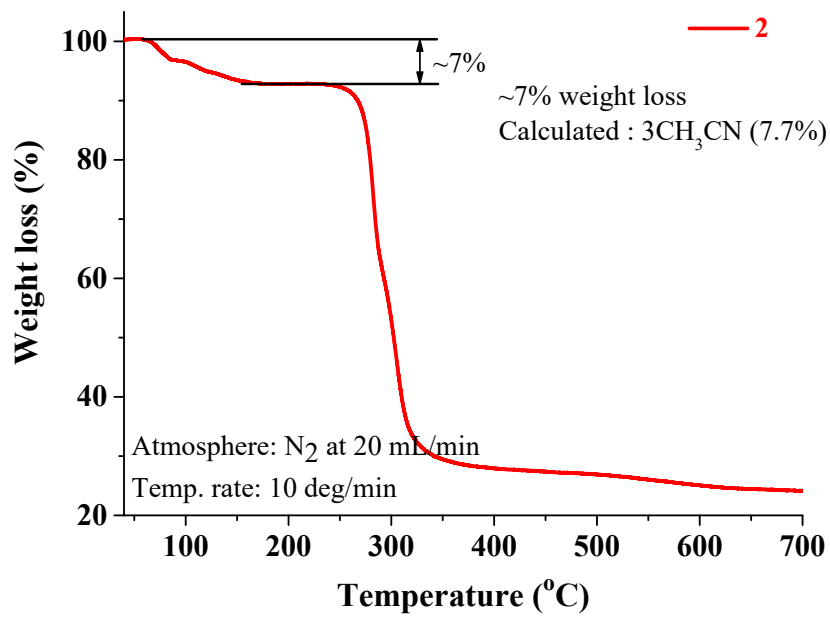

Figure S10. The TGA trace of complex 2.

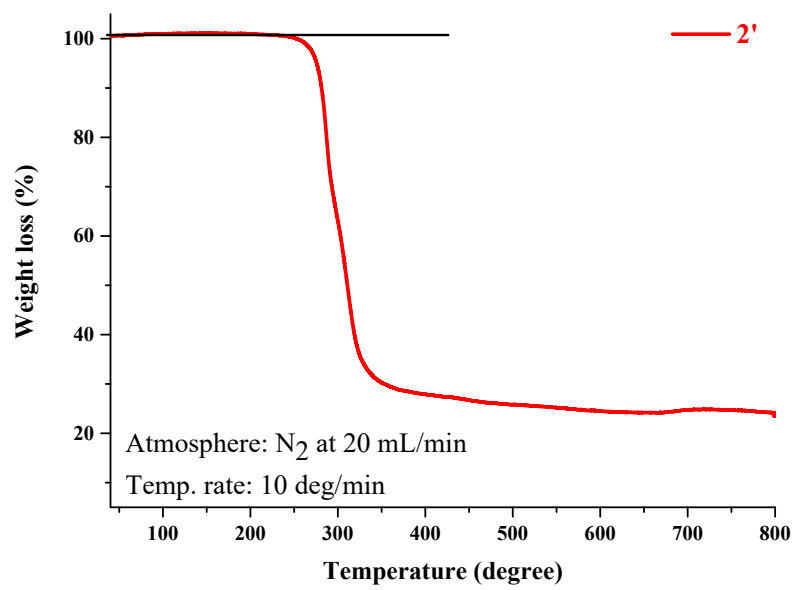

Figure S11. The TGA trace of complex 2'.

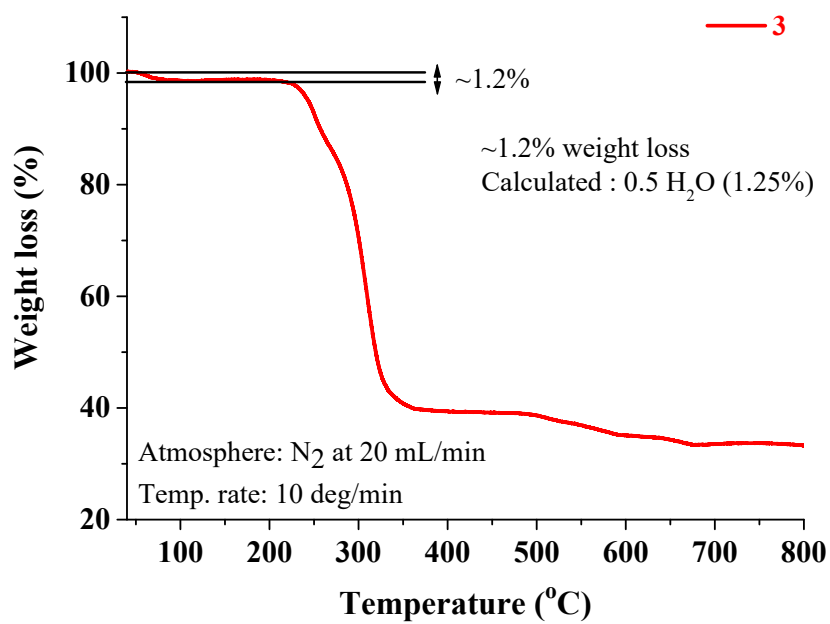

Figure S12. The TGA trace of complex 3.

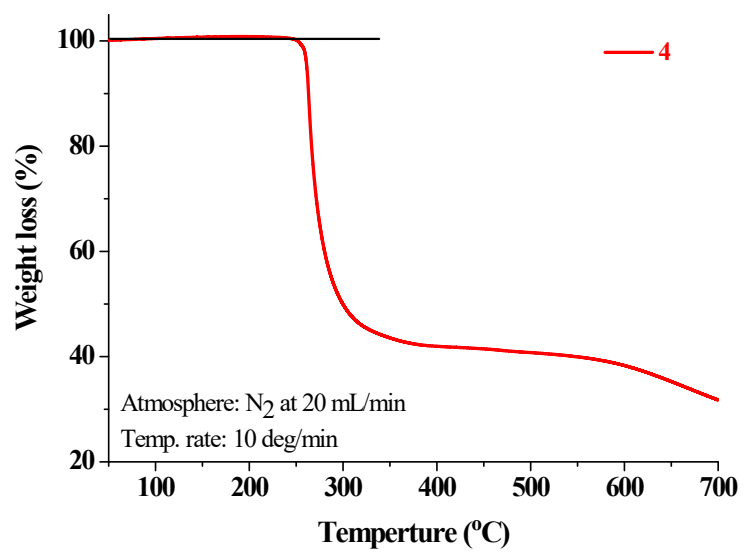

Figure S13. The TGA trace of complex 4.



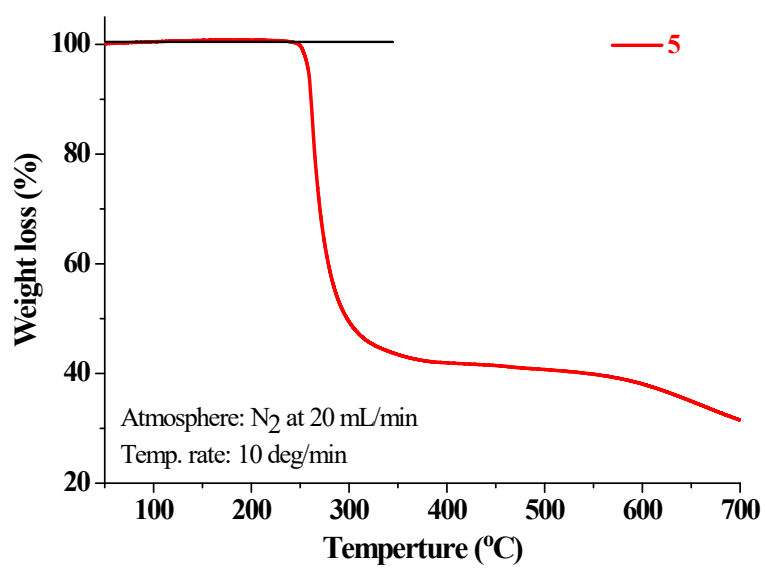

Figure S14. The TGA trace of complex 5.

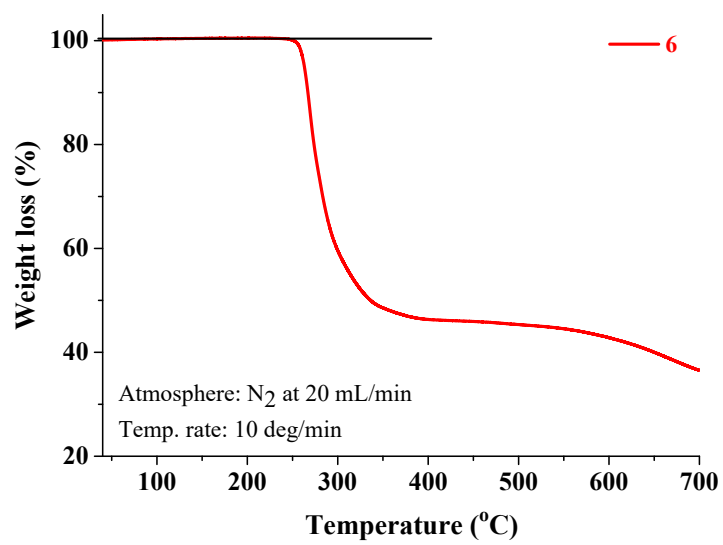

Figure S15. The TGA trace of complex **6**.

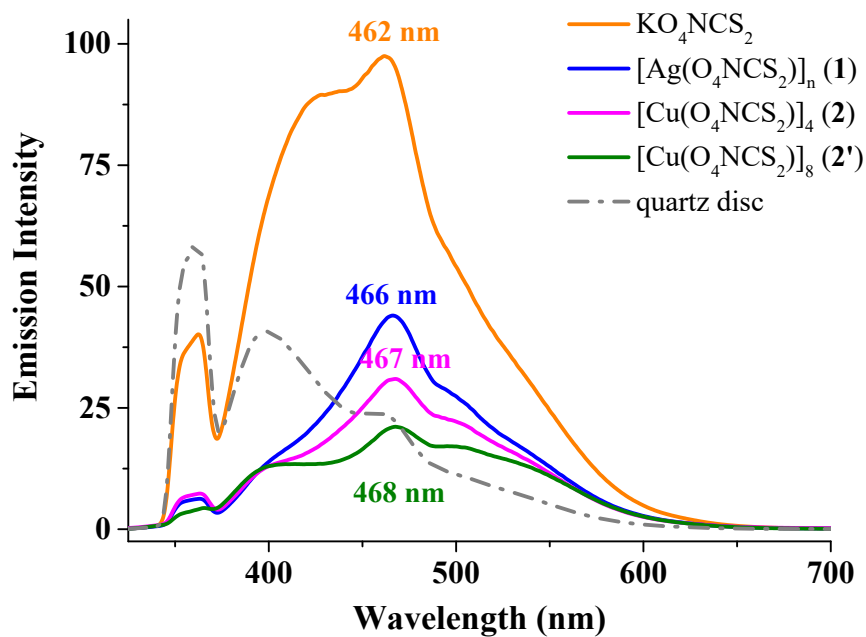

Figure S16. Luminescence spectra for solid samples of  $\text{KO}_4\text{NCS}_2$  (orange line), complexes **1** (blue line), **2** (pink line), and **2'** (green line) and quartz disc (background : gray dash dotted line) at room temperature. The excitation wavelength is 350 nm.

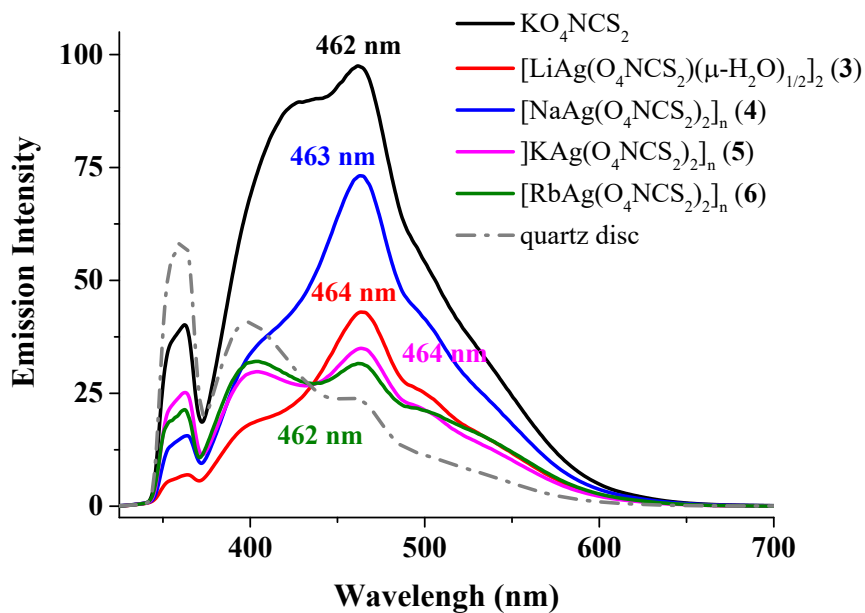

Figure S17. Luminescence spectra for solid samples of  $\text{KO}_4\text{NCS}_2$  (purple line), complexes **3** (red line), **4** (blue line), **5** (pink line), and **6** (green line) and quartz disc (background : gray dash dotted line) at room temperature. The excitation wavelength is 350 nm.
